# Supplementary material for: Evaluation of Techniques for Intensifying the Process of the Alcoholic Extraction of Coffee Ground Oil Using Ultrasound and a Pressurized Solvent
Source: MDPI journal article supplement (doi:10.3390/foods11040584), 2022-02-17
Supplement: s1 [file s1]

# Evaluation of Intensifying Techniques for the Alcoholic Extraction Process of Spent Coffee Grounds Oil Using Ultrasound and Pressurized Solvent

Tatiane Akemi Toda <sup>1</sup>, Ana Julia Morelli Santana <sup>1</sup>, Julieta Adriana Ferreira <sup>2</sup>, Eliria Maria de Jesus Agnolon Pallone <sup>2</sup>, Claudio Lima de Aguiar <sup>3</sup> and Christianne Elisabete da Costa Rodrigues <sup>1,\*</sup>

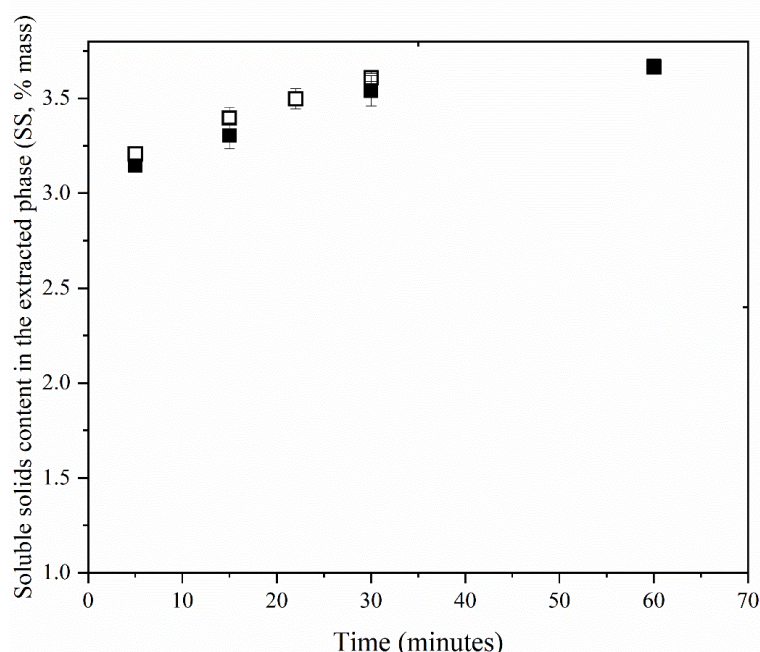

**Figure S1.** Extraction kinetics of total soluble solids from spent coffee grounds (mass% in the extracted phase) using absolute ethanol, solid:solvent mass ratio of 1:5, at 50 °C. Nominal power intensities of (■) 188 W and (□) 611 W.

**Table S1.** Actual ultrasound power ( $P_a$ , W), power density (AED,  $W \cdot L^{-1}$ ), and ultrasonic power intensity (UI,  $W \cdot cm^{-2}$ ) of SCGO ultrasound assisted extractions.

| Solvent | Solid:solvent mass ratio | Nominal power (W) | Actual ultrasound power ( $P_a$ ) (W) <sup>a</sup> | CV <sup>b</sup> | Power density (AED) ( $W \cdot L^{-1}$ ) <sup>1</sup> | CV <sup>b</sup> | Ultrasonic power intensity (UI) ( $W \cdot cm^{-2}$ ) <sup>c</sup> |
|---------|--------------------------|-------------------|----------------------------------------------------|-----------------|-------------------------------------------------------|-----------------|--------------------------------------------------------------------|
| ET0     | 4                        | 200               | 25 ± 2 c                                           | 8.51            | 84 ± 7 c                                              | 8.31            | 5.06                                                               |
|         | 4                        | 600               | 73 ± 4 a                                           | 5.89            | 247 ± 14 a                                            | 5.64            | 14.90                                                              |
|         | 15                       | 200               | 23.07 ± 0.01 c                                     | 0.06            | 75.86 ± 0.00 c                                        | 0.00            | 4.70                                                               |
|         | 15                       | 400               | 46.15 ± 0.01 b                                     | 0.03            | 151.72 ± 0.00 b                                       | 0.00            | 9.41                                                               |
|         | 15                       | 600               | 69.26 ± 0.01 a                                     | 0.02            | 227.57 ± 0.01 a                                       | 0.00            | 14.12                                                              |
| ET6     | 4                        | 200               | 24.22 ± 0.01 c                                     | 0.04            | 83.76 ± 0.00 c                                        | 0.00            | 4.94                                                               |
|         | 4                        | 600               | 71 ± 2 a                                           | 2.97            | 246 ± 7 a                                             | 3.01            | 14.51                                                              |
|         | 15                       | 200               | 23.99 ± 0.01 c                                     | 0.04            | 80.78 ± 0.00 c                                        | 0.00            | 4.89                                                               |
|         | 15                       | 400               | 48.03 ± 0.02 b                                     | 0.05            | 161.57 ± 0.00 b                                       | 0.00            | 9.79                                                               |
|         | 15                       | 600               | 69 ± 4 a                                           | 6.02            | 232 ± 14 a                                            | 6.15            | 14.05                                                              |

<sup>a</sup> Calculated by Equation 4; <sup>b</sup> Coefficient of variation; <sup>c</sup> Calculated by Equation 5. Mean values followed by the same lowercase letters in the same column indicate no significant difference by the Duncan's test ( $p \leq 0.05$ ).
